# Supplementary material
Source: PubMed Central journal article supplement (PMC4140695)
Supplement: NIHMS433986-supplement-Supplement1.pdf [file NIHMS433986-supplement-Supplement1.pdf]

## Supplementary Appendix

This appendix has been provided by the authors to give readers additional information about their work.

Supplement to: Vaucher YE, Peralta-Carcelen M, Finer NN, et al. Neurodevelopmental outcomes in the early CPAP and pulse oximetry trial. *N Engl J Med* 2012;367:2495-504. DOI: 10.1056/NEJMoa1208506

## **Table of Contents for Web Appendix**

|                                                                                                                        |                 |
|------------------------------------------------------------------------------------------------------------------------|-----------------|
| <b>Investigators</b>                                                                                                   | <b>pp 2-8</b>   |
| <b>Methodology for limited ventilator strategy</b>                                                                     | <b>p 9</b>      |
| <b>Methodology for oximeter blinding strategy</b>                                                                      | <b>p 9-10</b>   |
| <b>Table S1: Demographic and Clinical Characteristics of the Follow-up Cohorts</b>                                     | <b>pp 11-12</b> |
| <b>Table S2: Outcomes of SUPPORT treatment arms by gestational age strata:<br/>CPAP vs. Surfactant</b>                 | <b>pp 13-14</b> |
| <b>Table S3: Outcomes of SUPPORT treatment arms by gestational age strata:<br/>Lower vs. Higher Saturation Targets</b> | <b>pp 15-16</b> |
| <b>Table S4: Comparison of cognitive outcomes of SUPPORT treatment arms</b>                                            | <b>pp 17</b>    |
| <b>Table S5: Reasons for Eye surgery Lower vs. Higher Oxygen Saturation Target Group</b>                               | <b>p 18</b>     |
| <b>References</b>                                                                                                      | <b>p 19</b>     |

## Investigators

The National Institutes of Health, the *Eunice Kennedy Shriver* National Institute of Child Health and Human Development (NICHD), and the National Heart, Lung, and Blood Institute (NHLBI) provided grant support for the Neonatal Research Network's SUPPORT Trial.

Data collected at participating sites of the NICHD Neonatal Research Network (NRN) were transmitted to RTI International, the data coordinating center (DCC) for the network, which stored, managed and analyzed the data for this study. On behalf of the NRN, Drs. Abhik Das (DCC Principal Investigator) and Marie Gantz (DCC Statistician) had full access to all the data in the study and take responsibility for the integrity of the data and accuracy of the data analysis.

We are indebted to our medical and nursing colleagues and the infants and their parents who agreed to take part in this study. The following investigators, in addition to those listed as authors, participated in this study:

NRN Steering Committee Chairs: Alan H. Jobe, MD PhD, University of Cincinnati (2003-2006); Michael S. Caplan, MD, University of Chicago, Pritzker School of Medicine (2006-2011).

Alpert Medical School of Brown University and Women & Infants Hospital of Rhode Island (U10 HD27904) – William Oh, MD; Angelita M. Hensman, RN BSN; Bonnie E. Stephens, MD; Barbara Alksninis, PNP; Dawn Andrews, RN; Kristen Angela, RN; Susan Barnett, RRT; Bill Cashore, MD; Melinda Caskey, MD; Kim Francis, RN;

Dan Gingras, RRT; Regina A. Gargus, MD FAAP; Katharine Johnson, MD; Shabnam Lainwala, MD; Theresa M. Leach, MEd CAES; Martha R. Leonard, BA BS; Sarah Lillie, RRT; Kalida Mehta; James R. Moore, MD; Lucy Noel; Suzy Ventura; Rachel V. Walden; Victoria E. Watson, MS CAS.

Case Western Reserve University, Rainbow Babies & Children's Hospital (U10 HD21364, M01 RR80) – Avroy A. Fanaroff, MD; Bonnie S. Siner, RN; Arlene Zadell RN; Julie DiFiore, BS; Monika Bhola, MD; Harriet G. Friedman, MA; Gulgun Yalcinkaya, MD.

Cincinnati Children's Hospital Medical Center, University of Cincinnati Hospital, and Good Samaritan Hospital (U10 HD27853, M01 RR8084) – Edward F. Donovan, MD; Vivek Narendran, MD MRCP; Kate Bridges, MD; Barbara Alexander, RN; Cathy Grisby, BSN CCRC; Marcia Worley Mersmann, RN CCRC; Holly L. Mincey, RN BSN; Jody Hessling, RN; Teresa L. Gratton, PA.

Duke University School of Medicine, University Hospital, Alamance Regional Medical Center, and Durham Regional Hospital (U10 HD40492, M01 RR30) – Ronald N. Goldberg, MD; C. Michael Cotten, MD MHS; Patricia Ashley, MD; Kathy J. Auten, MSHS; Kimberley A. Fisher, PhD FNP-BC IBCLC; Katherine A. Foy, RN; Sharon F. Freedman, MD; Kathryn E. Gustafson, PhD; Melody B. Lohmeyer, RN MSN; William F. Malcolm, MD; David K. Wallace, MD MPH.

Emory University, Children's Healthcare of Atlanta, Grady Memorial Hospital, and Emory Crawford Long Hospital (U10 HD27851, RR25008, M01 RR39) – Barbara J. Stoll, MD; Susie Buchter, MD; Anthony J. Piazza, MD; David P. Carlton, MD; Linda Black, MD; Ann M. Blackwelder, RNC BS MS; Sheena Carter, PhD; Elisabeth

Dinkins, PNP; Sobha Fritz, PhD; Ellen C. Hale, RN BS CCRC; Amy K. Hutchinson, MD; Maureen Mulligan LaRossa, RN; Gloria V. Smikle, PNP MSN.

*Eunice Kennedy Shriver* National Institute of Child Health and Human Development – Stephanie Wilson Archer, MA.

Indiana University, University Hospital, Methodist Hospital, Riley Hospital for Children, and Wishard Health Services (U10 HD27856, M01 RR750) –James A. Lemons, MD; Leslie D. Wilson, BSN CCRC; Faithe Hamer, BS; Ann B. Cook, MS; Dianne E. Herron, RN; Carolyn Lytle, MD MPH; Heike M. Minnich, PsyD HSPP.

National Heart, Lung, and Blood Institute – Mary Anne Berberich, PhD; Carol J. Blaisdell, MD; Dorothy B. Gail, PhD; James P. Kiley, PhD.

RTI International (U10 HD36790) – W. Kenneth Poole, PhD; Jamie E. Newman, PhD MPH; Betty K. Hastings; Jeanette O'Donnell Auman, BS; Carolyn Petrie Huitema, MS; James W. Pickett II, BS; Dennis Wallace, PhD; Kristin M. Zaterka-Baxter, RN BSN.

Stanford University and Lucile Packard Children's Hospital (U10 HD27880, UL1 RR25744, M01 RR70) – Krisa P. Van Meurs, MD; David K. Stevenson, MD; M. Bethany Ball, BS CCRC; Barbara Bentley, PsychD MEd; Elizabeth F. Bruno, PhD; Alexis S. Davis, MD MS; Maria Elena DeAnda, PhD; Anne M. DeBattista, RN, PNP; Jean G. Kohn, MD MPH; Melinda S. Proud, RCP; Renee P. Pyle, PhD; Nicholas H. St. John, PhD; Hali E. Weiss, MD.

Tufts Medical Center, Floating Hospital for Children (U10 HD53119, M01 RR54) – Ivan D. Frantz III, MD; John M. Fiascone, MD; Anne Furey, MPH; Brenda L. MacKinnon, RNC; Ellen Nysten, RN BSN; Ana Brussa, MS OTR/L; Cecelia Sibley, PT MHA.

University of Alabama at Birmingham Health System and Children’s Hospital of Alabama (U10 HD34216, M01 RR32) – Namasivayam Ambalavanan, MD; Monica V. Collins, RN BSN MaEd; Shirley S. Cosby, RN BSN. Vivien A. Phillips, RN BSN; Kirstin J. Bailey, PhD; Fred J. Biasini, PhD; Maria Hopkins, PhD; Kristen C. Johnston, MSN CRNP; Sara Krzywanski, MS; Kathleen G. Nelson, MD; Cryshelle S. Patterson, PhD; Richard V. Rector, PhD; Leslie Rodriguez, PhD; Amanda Soong, MD; Sally Whitley, MA OTR-L FAOTA; Sheree York, PT DPT MS PCS.

University of California – San Diego Medical Center and Sharp Mary Birch Hospital for Women (U10 HD40461) – Maynard R. Rasmussen, MD; Paul R. Wozniak, MD; Kathy Arnell, RNC; Rene Renee Bridge, RN; Clarence Demetrio, RN; Martha G. Fuller, RN MSN;

University of Iowa Children's Hospital (U10 HD53109, UL1 RR24979, M01 RR59) – Edward F. Bell, MD; John A. Widness, MD; Jonathan M. Klein, MD; Tarah T. Colaizy, MD MPH; Karen J. Johnson, RN BSN; Diane L. Eastman, RN CPNP MA.

University of Miami, Holtz Children's Hospital (U10 HD21397, M01 RR16587) – Shahnaz Duara, MD; Ruth Everett-Thomas, RN MSN; Maria Calejo, MEd; Alexis N. Diaz, BA; Silvia M. Frade Eguaras, BA; Andrea Garcia, MA; Kasey Hamlin-Smith, PhD; Michelle Harwood Berkowits, PhD; Sylvia Hiriart-Fajardo, MD; Elaine O. Mathews, RN; Helina Pierre, BA; Arielle Riguard, MD; Alexandra Stroerger, BA.

University of New Mexico Health Sciences Center (U10 HD53089, M01 RR997) – Kristi L. Watterberg, MD; Robin K. Ohls, MD; Julie Rohr, MSN RNC CNS; Conra Backstrom Lacy, RN; Jean Lowe, PhD; Rebecca Montman, BSN.

University of Rochester Medical Center, Golisano Children's Hospital (U10 HD40521, M01 RR44) – Nirupama Laroia, MD; Dale L. Phelps, MD; Gary David Markowitz, MD; Linda J. Reubens, RN CCRC; Diane Hust, MS RN CS; Lisa Augostino; Julie Babish Johnson, MSW; Erica Burnell, RN; Harris Gelbard, MD PhD; Rosemary L. Jensen; Emily Kushner, MA; Joan Merzbach, LMSW; Jonathan Mink, MD PhD; Carlos Torres, MD; David Wang, MD; Kelley Yost, PhD.

University of Texas Southwestern Medical Center at Dallas, Parkland Health & Hospital System, and Children's Medical Center Dallas (U10 HD40689, M01 RR633) – Pablo J. Sánchez, MD; Charles R. Rosenfeld, MD; Walid A. Salhab, MD; Sally S. Adams, MS RN CPNP; James Allen, RRT; Laura Grau, RN; Alicia Guzman; Gaynelle Hensley, RN; Elizabeth T. Heyne, PsyD PA-C; Melissa H. Lepps, RN; Linda A. Madden, RN CPNP; Melissa Martin, RN; Nancy A. Miller, RN; Janet S. Morgan, RN; Araceli Solis, RRT; Lizette E. Torres, RN; Catherine Twell Boatman, MS CIMI; Diana M. Vasil, RNC-NIC; Kerry Wilder, RN.

University of Texas Health Science Center at Houston Medical School and Children's Memorial Hermann Hospital (U10 HD21373) – Kathleen A. Kennedy, MD MPH; Jon E. Tyson, MD MPH; Nora I. Alaniz, BS; Patricia Evans, MD; Beverly Foley Harris, RN BSN; Charles Green, PhD; Margarita Jiminez, MD MPH; Anna E. Lis, RN BSN; Sarah Martin, RN BSN; Georgia E. McDavid, RN; Brenda H. Morris, MD; Margaret L. Poundstone, RN BSN;

Stacy Reddoch, BA; Saba Siddiki, MD; Patti L. Pierce Tate, RCP; Laura L. Whitely, MD; Sharon L. Wright, MT (ASCP).

University of Utah Medical Center, Intermountain Medical Center, LDS Hospital, and Primary Children's Medical Center (U10 HD53124, M01 RR64) – Shawna Baker, RN; Karie Bird, RN; Jill Burnett, RN; Laura Cole, RN; Karen A. Osborne, RN BSN CCRC; Cynthia Spencer, RNC; Mike Steffens, PhD; Kimberlee Weaver-Lewis, RN BSN; Karen Zanetti, RN.

Wake Forest University, Baptist Medical Center, Brenner Children's Hospital, and Forsyth Medical Center (U10 HD40498, M01 RR7122) – Robert G. Dillard, MD; Lisa K. Washburn, MD; Nancy J. Peters, RN CCRP; Barbara G. Jackson, RN BSN; Korinne Chiu, MA; Deborah Evans Allred, MA LPA; Donald J. Goldstein, PhD; Raquel Halfond, MA; Carroll Peterson, MA; Ellen L. Waldrep, MS; Cherrie D. Welch, MD MPH; Melissa Whalen Morris, MA; Gail Wiley Hounshell, PhD.

Wayne State University, Hutzel Women's Hospital, and Children's Hospital of Michigan (U10 HD21385) – Seetha Shankaran, MD; Beena G. Sood, MD MS; Rebecca Bara, RN BSN; Elizabeth Billian, RN MBA; Laura A. Goldston, MA; Mary Johnson, RN BSN.

Yale University, Yale-New Haven Children's Hospital, and Bridgeport Hospital (U10 HD27871, UL1 RR24139, M01 RR125) – Vineet Bhandari, MD DM; Harris C. Jacobs, MD; Pat Cervone, RN; Patricia Gettner, RN; Monica Konstantino, RN BSN; JoAnn Poulsen, RN; Janet Taft, RN BSN; Christine G. Butler, MD; Nancy Close, PhD; Walter Gilliam, PhD; Sheila Greisman, RN; Elaine Romano, MSN; Joanne Williams, RN BSN.



Data and Safety Monitoring Committee – Gordon Avery, MD, chair, Children’s National Medical Center; Christine A. Gleason, MD, chair, University of Washington; Marilee C. Allen, MD, Johns Hopkins University School of Medicine; Shrikant I. Bangdiwala, PhD, University of North Carolina; Carol J. Blaisdell, MD, National Heart, Lung, and Blood Institute; Robert J. Boyle, MD, University of Virginia Health System; Traci Clemons, PhD, The EMMES Corporation; Mary E. D’Alton, MD, Columbia University; Abhik Das (ex officio), PhD, RTI International; Dorothy B. Gail, PhD, National Heart, Lung, and Blood Institute; Carl Hunt, MD, National Heart, Lung, and Blood Institute; Martin Keszler, MD, Georgetown University Hospital; W. Kenneth Poole (ex officio), PhD, RTI International; Carol K. Redmond, ScD, University of Pittsburg; Michael G. Ross, MD, MPH, UCLA School of Medicine and Public Health; Merran A. Thomson, MD, Hammersmith Hospital, UK; Steven J. Weiner, MS, The George Washington University; Marian Willinger (ex officio), PhD, Eunice Kennedy Shriver National Institute of Child Health and Human Development.

Retinopathy of Prematurity Adjudication Committee - Gary David Markowitz, MD, University of Rochester; Amy K. Hutchinson, MD, Emory University; David K. Wallace, MD, MPH, Duke University; Sharon F. Freedman, MD, Duke University.

## Methodology for limited ventilator strategy

### CPAP Arm:

NICU management: CPAP infants could be intubated if they met any of the following criteria: an  $\text{FiO}_2 > .50$  required to maintain an indicated  $\text{SpO}_2 > 88\%$  for one hour, an arterial  $\text{PaCO}_2 > 65$  torr documented on a single blood gas within 1 hour prior to intubation, or hemodynamic instability defined as a low blood pressure for gestational age and/or poor perfusion, requiring volume and/or pressor support for a period of 4 hours or more. If intubated within the first 48 hours of life, infants were to receive surfactant. Following NICU admission, each unit utilized its standard method for CPAP delivery, which included the use of a ventilator, purpose built flow driver, or bubble CPAP circuit. Extubation for CPAP infants was to be attempted within 24 hours if all of the following criteria were met: a  $\text{PaCO}_2 < 65$  torr with a  $\text{pH} > 7.20$ , an  $\text{SpO}_2 > 88\%$  with an  $\text{FiO}_2 < 50\%$ , a mean airway pressure (MAP)  $< 10$  cm  $\text{H}_2\text{O}$ , ventilator rate  $< 20$  bpm, an amplitude  $< 2\text{X}$  MAP if on high frequency ventilation (HFV), and hemodynamically stable, and without a clinically significant patent ductus arteriosus. Re-intubation criteria were the same as those for intubation. After 3 intubations, CPAP infants were treated using NICU standard practice.

**Surfactant Arm:** All infants were to be extubated within 24 hours of meeting all of the following criteria:  $\text{PaCO}_2 < 50$  torr and  $\text{pH} > 7.30$ ,  $\text{FiO}_2 \leq .35$  with a  $\text{SpO}_2 > 88\%$ , a MAP  $< 8$  cm  $\text{H}_2\text{O}$ , ventilator rate  $< 20$  bpm, an amplitude  $< 2\text{X}$  MAP if on HFV, and hemodynamically stable without evidence of clinically significant PDA. Once extubated, Surfactant infants were treated using NICU standard practice.

These criteria for both arms were in effect for the first 14 days of life, following which the infant was treated as per NICU standard practice. For both arms intubation could be performed at any time for the occurrence of repetitive apnea requiring bag and mask ventilation, clinical shock, sepsis, and/or the need for surgery.<sup>1</sup>

## Methodology for oximeter blinding strategy

### 4.1.1 Randomization and Masking, Storing and Assigning Oximeters

Two sets of envelopes will be used; one for the gestational age group 24 -25 6/7 weeks and one for the 26 - 27 6/7 week gestational age group.... Inside the sealed envelope will be a white card which will contain the randomization number and treatment assignments. The card will indicate which of the Early CPAP/Early Surfactant treatments is selected and will indicate a color code for the High/Low  $\text{SpO}_2$  arm of the study. They will be specified as one of the following:

- **Treatment Group** (EARLY CPAP and permissive ventilation management) with an **Oximeter code** of either **Blue or Orange** OR
- **Control Group** (Early SURFACTANT and conventional ventilator management) with an **Oximeter code** of either **Blue or Orange**.

The **Blue/Orange codes** will designate an assignment to either the **Low (85% - 89%)** or **High (91% -95%)**  $\text{SpO}_2$  group. The oximeters will be shipped directly to the clinical sites from Masimo. The Data Center will supply the

sites with the **Blue and Orange** labels and these color coded labels will correspond to the serial numbers on the oximeter(s). The serial number(s) will need to be recorded on the appropriate data form (**SUPP04 Form**).

**Note: The oximeters should be stored in such a manner that the individual who will be obtaining them and returning them to their original location can easily identify which oximeters belong to which color-coded randomization group. It is not recommended that the oximeters be identified with the blue or orange colored labels. A system whereby the serial numbers for each color group are identified at the storage sight, along with a list of which infants have been placed on which serial numbers, makes it possible to track oximeters without using the color coded labels on the devices themselves.**

The person opening the envelope should announce to the team the assignment of the Early CPAP/Early Surfactant arm of the study. Someone should then take the opened envelope to the secure area where the oximeters are stored and select the oximeter (s) whose color code is specified in the randomization envelope. **Once the envelope is opened, it should be stored in a secure location only accessible to staff with “a need to know”.** Randomization should be done only if sufficient numbers of oximeters of both types (i.e. high and low SpO2) are available to accommodate the delivery. Once the use of an oximeter has been completed, it should be returned to the color coded location for storing the inventory of oximeters (e.g., a color coded shelf) checking to be sure that the serial numbers match. A log should be maintained to record the date and time the particular oximeter is returned to this location.<sup>2</sup>

**Table S1: Demographic and Clinical Characteristics of the Follow-up Cohorts**

|                                                     | <u>CPAP</u>   | <u>Surfactant</u> | <u>Lower</u><br><u>Saturation</u> | <u>Higher</u><br><u>Saturation</u> |
|-----------------------------------------------------|---------------|-------------------|-----------------------------------|------------------------------------|
|                                                     | N=511         | N=479             | N=479                             | N=511                              |
| Birth weight (grams) <sup>δ</sup>                   | 849±186       | 852±193           | 858±186                           | 844±192                            |
| Gestational age (weeks) <sup>δ</sup>                | 26.3±1.1      | 26.3±1.1          | 26.3±1.1                          | 26.2±1                             |
|                                                     | n/total(%)    | n/total(%)        | n/total(%)                        | n/total(%)                         |
| SGA (birthweight < 10 <sup>th</sup> %) <sup>€</sup> | 23/511 (4.5)  | 32/479 (6.7)      | 17/479 (3.5)**                    | 38/511(7.4)**                      |
| Male <sup>€</sup>                                   | 256/511(50.1) | 266/479(55.5)     | 240/479(50.1)                     | 282/511(55.2)                      |
| Non-Hispanic White <sup>€</sup>                     | 196/511(38.4) | 200/479(41.8)     | 178/479(37.2)                     | 218/511(42.7)                      |
| Non-Hispanic Black <sup>€</sup>                     | 200/511(39.1) | 177/479(37)       | 201/479(42)                       | 176/511(34.4)                      |
| Hispanic <sup>€</sup>                               | 98/511(19.2)  | 85/479(17.7)      | 86/479(18)                        | 97/511(19)                         |
| Other or unknown <sup>€</sup>                       | 17/511(3.3)   | 17/479(3.5)       | 14/479(2.9)                       | 20/511(3.9)                        |
| Multiple gestation <sup>€</sup>                     | 138/511(27)   | 114/479(23.8)     | 124/479(25.9)                     | 128/511(25)                        |
| Antenatal steroids, any <sup>€</sup>                | 493/511(96.5) | 456/479(95.2)     | 462/479(96.5)                     | 487/511(95.3)                      |
| Cesarean section <sup>€</sup>                       | 352/511(68.9) | 315/479(65.8)     | 332/479(69.3)                     | 335/511(65.6)                      |
| Public insurance only <sup>€</sup>                  | 262/511(51.3) | 257/479(53.7)     | 253/479(52.8)                     | 266/511(52.1)                      |
| Mother married <sup>€</sup>                         | 244/511(47.7) | 221/479(46.1)     | 222/479(46.3)                     | 243/511(47.6)                      |
| Living with both biological parents <sup>€</sup>    | 348/510(68.2) | 329/479(68.7)     | 332/478(69.5)                     | 345/511(67.5)                      |
| Maternal education< high school                     | 128/506(25.3) | 116/469(24.7)     | 115/471(24.4)                     | 129/504(25.6)                      |

| degree <sup>€</sup>                              |               |               |                            |                             |
|--------------------------------------------------|---------------|---------------|----------------------------|-----------------------------|
| Income < \$30,000/year <sup>€</sup>              | 260/493(52.7) | 251/461(54.4) | 239/456(52.4)              | 272/498(54.6)               |
| English as primary language <sup>€</sup>         | 426/510(83.5) | 403/478(84.3) | 402/477(84.3)              | 427/511(83.6)               |
| Severe ROP <sup>€</sup>                          | 62/479(12.9)  | 58/434(13.4)  | 38/442(8.6) <sup>***</sup> | 82/471(17.4) <sup>***</sup> |
| BPD <sup>¶</sup> <sup>€</sup>                    | 193/511(37.8) | 187/479(39)   | 177/479(37)                | 203/511(39.7)               |
| IVH grade 3-4/PVL <sup>€</sup>                   | 70/510(13.7)  | 46/478(9.6)   | 56/478(11.7)               | 60/510(11.8)                |
| NEC <sup>€</sup>                                 | 56/511(11)*   | 30/479(6.3)*  | 42/479(8.8)                | 44/511(8.6)                 |
| Late onset sepsis/meningitis <sup>€</sup>        | 167/511(32.7) | 154/479(32.2) | 155/479(32.4)              | 166/511(32.5)               |
| Postnatal steroids <sup>€</sup>                  | 34/508(6.7)*  | 55/476(11.6)* | 41/477(8.6)                | 48/507(9.5)                 |
| Corrected age at follow up (months) <sup>δ</sup> | 19.9±2.4      | 20.1±2.7      | 19.9±2.4                   | 20.2±2.7                    |

<sup>δ</sup> Mean ± SD

<sup>€</sup> no./total no.(%)

<sup>¶</sup> At 36 weeks postmenstrual age

\*p<0.05, \*\* p<0.01, \*\*\*p<0.001 (Comparison for groups within each intervention arm)

Comparisons of neonatal outcomes adjusted for stratification by center and gestational age and for familial clustering

**Table S2: Outcomes for treatment groups by gestational age strata: CPAP vs. SURFACTANT**

| <u>24 0/7-25 6/7 weeks</u>     | CPAP*         | Surfactant*   | ARR**           | p    |
|--------------------------------|---------------|---------------|-----------------|------|
| Death or NDI                   | 109/272(40.1) | 118/265(44.5) | 0.9 (0.74,1.09) | 0.27 |
| Death before 18-22 mo CA       | 73/277(26.4)  | 97/273(35.5)  | 0.74(0.57,0.96) | 0.02 |
| Death/NDI determined           | 272/285(95.4) | 265/280(94.6) | 1.01(0.97,1.05) | 0.68 |
| NDI                            | 36/199(18.1)  | 21/168(12.5)  | 1.37(0.83,2.27) | 0.22 |
| BSID-III cognitive score < 70  | 23/198(11.6)  | 16/167(9.6)   | 1.16(0.64,2.12) | 0.62 |
| Gross motor function level ≥ 2 | 17/201(8.5)   | 9/172(5.2)    | 1.52(0.7,3.29)  | 0.29 |
| Moderate/severe cerebral palsy | 14/201(7.0)   | 8/172(4.7)    | 1.32(0.57,3.04) | 0.51 |
| Blindness, bilateral           | 2/201(1.0)    | 2/172(1.2)    | 0.86(0.12,6.02) | 0.88 |
| Hearing impairment             | 11/201(5.5)   | 3/172(1.7)    | 3.24(0.9,11.71) | 0.07 |
| <br>                           |               |               |                 |      |
| <u>26 0/7-27 6/7 weeks</u>     | CPAP*         | Surfactant*   | ARR**           | p    |
| Death or NDI                   | 64/349(18.3)  | 65/348(18.7)  | 0.99(0.72,1.35) | 0.93 |
| Death before 18-22 mo CA       | 45/366(12.3)  | 43/365(11.8)  | 1.05(0.71,1.55) | 0.82 |
| Death/NDI determined           | 349/378(92.3) | 348/373(93.3) | 0.99(0.95,1.03) | 0.57 |
| NDI                            | 19/304(6.3)   | 22/305(7.2)   | 0.93(0.5,1.72)  | 0.81 |
| BSID-III cognitive score < 70  | 13/304(4.3)   | 20/305(6.6)   | 0.74(0.36,1.51) | 0.41 |
| Gross motor function level ≥ 2 | 9/310(2.9)    | 14/307(4.6)   | 0.61(0.27,1.4)  | 0.24 |
| Moderate/severe cerebral palsy | 7/310(2.3)    | 11/307(3.6)   | 0.62(0.24,1.58) | 0.31 |

|                      |            |            |                 |      |
|----------------------|------------|------------|-----------------|------|
| Blindness, bilateral | 2/310(0.6) | 5/307(1.6) | 0.39(0.08,1.99) | 0.26 |
| Hearing impairment   | 6/310(1.9) | 4/307(1.3) | 1.53(0.44,5.26) | 0.50 |

\*no./total no. (%)

\*\* Adjusted Relative Risk (95% CI)

Relative risk and p values adjusted for stratification factors (study center and interaction between treatment and gestational age group) and familial clustering (except blindness was not adjusted for study center due to small N)

**Table S3: Outcomes for treatment groups by gestational age strata: LOWER VS. HIGHER OXYGEN SATURATION TARGETS**

| <u>24 0/7-25 6/7 weeks</u>     | Lower*        | Higher*       | ARR**             | p    |
|--------------------------------|---------------|---------------|-------------------|------|
| Death or NDI                   | 115/261(44.1) | 112/276(40.6) | 1.09(0.89,1.32)   | 0.42 |
| Death before 18-22 mo CA       | 91/267(34.1)  | 79/283(27.9)  | 1.23(0.95,1.59)   | 0.12 |
| Death/NDI determined           | 261/276(94.6) | 276/289(95.5) | 0.99(0.96,1.03)   | 0.69 |
| NDI                            | 24/170(14.1)  | 33/197(16.8)  | 0.8(0.49,1.3)     | 0.37 |
| BSID-III cognitive score < 70  | 17/169(10.1)  | 22/196(11.2)  | 0.86(0.47,1.56)   | 0.62 |
| Gross motor function level ≥ 2 | 13/173(7.5)   | 13/200(6.5)   | 1.07(0.53,2.17)   | 0.86 |
| Moderate/severe cerebral palsy | 10/173(5.8)   | 12/200(6.0)   | 0.86(0.39,1.88)   | 0.70 |
| Blindness, bilateral           | 1/173(0.6)    | 3/200(1.5)    | 0.39(0.04,3.69)   | 0.41 |
| Blindness, in at least one eye | 1/173 (0.6)   | 3/200 (1.5)   | 0.39 (0.04, 3.69) | 0.41 |
| Hearing impairment             | 4/173(2.3)    | 10/200(5.0)   | 0.5(0.16,1.53)    | 0.22 |
| <br>                           |               |               |                   |      |
| <u>26 0/7-27 6/7 weeks</u>     | Lower*        | Higher*       | ARR**             | p    |
| Death or NDI                   | 70/351(19.9)  | 59/346(17.1)  | 1.17(0.85,1.6)    | 0.33 |
| Death before 18-22 mo CA       | 49/366(13.4)  | 39/365(10.7)  | 1.28(0.86,1.89)   | 0.22 |



|                                     |               |               |                  |      |
|-------------------------------------|---------------|---------------|------------------|------|
| Death/NDI determined                | 351/378(92.9) | 346/373(92.8) | 1(0.96,1.04)     | 0.97 |
| NDI                                 | 21/302(7.0)   | 20/307(6.5)   | 0.99(0.54,1.84)  | 0.98 |
| BSID-III cognitive score < 70       | 17/302(5.6)   | 16/307(5.2)   | 0.98(0.49,1.97)  | 0.95 |
| Gross motor function level $\geq$ 2 | 13/306(4.2)   | 10/311(3.2)   | 1.32(0.57,3.01)  | 0.52 |
| Moderate/severe cerebral pal        | 10/306(3.3)   | 8/311(2.6)    | 1.22(0.47,3.2)   | 0.68 |
| Blindness, bilateral                | 4/306(1.3)    | 3/311(1.0)    | 1.38(0.31,6.05)  | 0.67 |
| Blindness, in at least one eye      | 4/306 (1.3)   | 5/311 (1.6)   | 0.83(0.23,3.03)  | 0.78 |
| Hearing impairment                  | 8/306(2.6)    | 2/311(0.6)    | 4.18(0.88,19.87) | 0.07 |

\*no./total no. (%)

\*\* Adjusted Relative Risk (95% CI)

Relative risk and p values adjusted for stratification factors (study center and interaction between treatment and gestational age group) and familial clustering (except blindness was not adjusted for study center due to small N)

**Table S4: Comparison of Cognitive outcomes for SUPPORT treatment arms**

| <u>CPAP vs. Surfactant</u>               | CPAP          | SURF          | ARR*            | p    |
|------------------------------------------|---------------|---------------|-----------------|------|
| BSID-III cognitive composite score**     | 91.3 ± 0.7    | 90.4 ± 0.8    |                 | 0.33 |
| BSID-III cognitive composite score ***   | 90(85,100)    | 90(80,100)    |                 |      |
| BSID-III cognitive composite score < 85¶ | 111/502(22.1) | 126/472(26.7) | 0.82(0.66,1.02) | 0.08 |
| BSID-III cognitive composite score < 80¶ | 65/502(12.9)  | 81/472(17.2)  | 0.74(0.55,1)    | 0.05 |

Lower vs. Higher Oxygen Saturation Targets

|                                          | LOWER         | HIGHER        | ARR*            | p    |
|------------------------------------------|---------------|---------------|-----------------|------|
| BSID-III cognitive composite score **    | 91.2 ± 0.8    | 90.5 ± 0.7    |                 | 0.48 |
| BSID-III cognitive composite score ***   | 90(85,100)    | 90(80,100)    |                 |      |
| BSID-III cognitive composite score < 85¶ | 105/471(22.3) | 132/503(26.2) | 0.85(0.68,1.07) | 0.16 |
| BSID-III cognitive composite score < 80¶ | 68/471(14.4%) | 78/503(15.5%) | 0.91(0.67,1.22) | 0.53 |

\*ARR ( Adjusted relative risk)

\*\* (adjusted mean ± standard error)

\*\*\*(median, interquartile range)

¶ [no./total no.(%)]

Means, relative risks and p values adjusted for stratification factors (study center and gestational age group) and familial clustering

**Table S5: Reasons for Eye surgery Lower vs. Higher Oxygen Saturation Target Groups**

| <b>Reason for Eye surgery</b> | <b>Lower<br/>N=31</b> | <b>Higher<br/>N=67</b> | <b>Total<br/>N=98</b> |
|-------------------------------|-----------------------|------------------------|-----------------------|
| Retinopathy of Prematurity    | 26 (84%)              | 59 (88%)               | 85 (87%)              |
| Strabismus                    | 1 (3%)                | 4 (6%)                 | 5 (5%)                |
| Cataract                      | 1 (3%)                | 0                      | 1 (1%)                |
| Other                         | 3 (10%)               | 4 (6%)                 | 7 (7%)                |

## References

1. Finer NN, Carlo WA, Walsh MC, et al. Early CPAP versus surfactant in extremely preterm infants. *N Engl J Med* 2010;362:1970-9.
2. SUPPORT Manual of Operations, January 4, 2005, Revised March 10, 2005
